# Supplementary material for: Spatial Variation of the Native Colon Microbiota in Healthy Adults
Source: Oxford University Press journal article supplement (doi:10.1158/1940-6207.capr-17-0370), 2018-04-10
Supplement: 19406207capr170370-sup-192555_2_supp_4625588_p5j8s5.docx [file 19406207capr170370-sup-192555_2_supp_4625588_p5j8s5.docx]

**Figure S1. Location and relative abundance of cancer-associated OTUs.** Relative abundance was calculated and plotted by sample site for each OTU of interest: (A) *Fusobacterium nucleatum* subsp. *animalis* (B) *Fusobacterium varium* and (C) *Porphyromonas asacharolytica*
